# Supplementary material for: Multicenter International Study of the Consensus Immunoscore for the Prediction of Relapse and Survival in Early-Stage Colon Cancer
Source: MDPI journal article supplement (doi:10.3390/cancers15020418), 2023-01-08
Supplement: s1 [file s1]

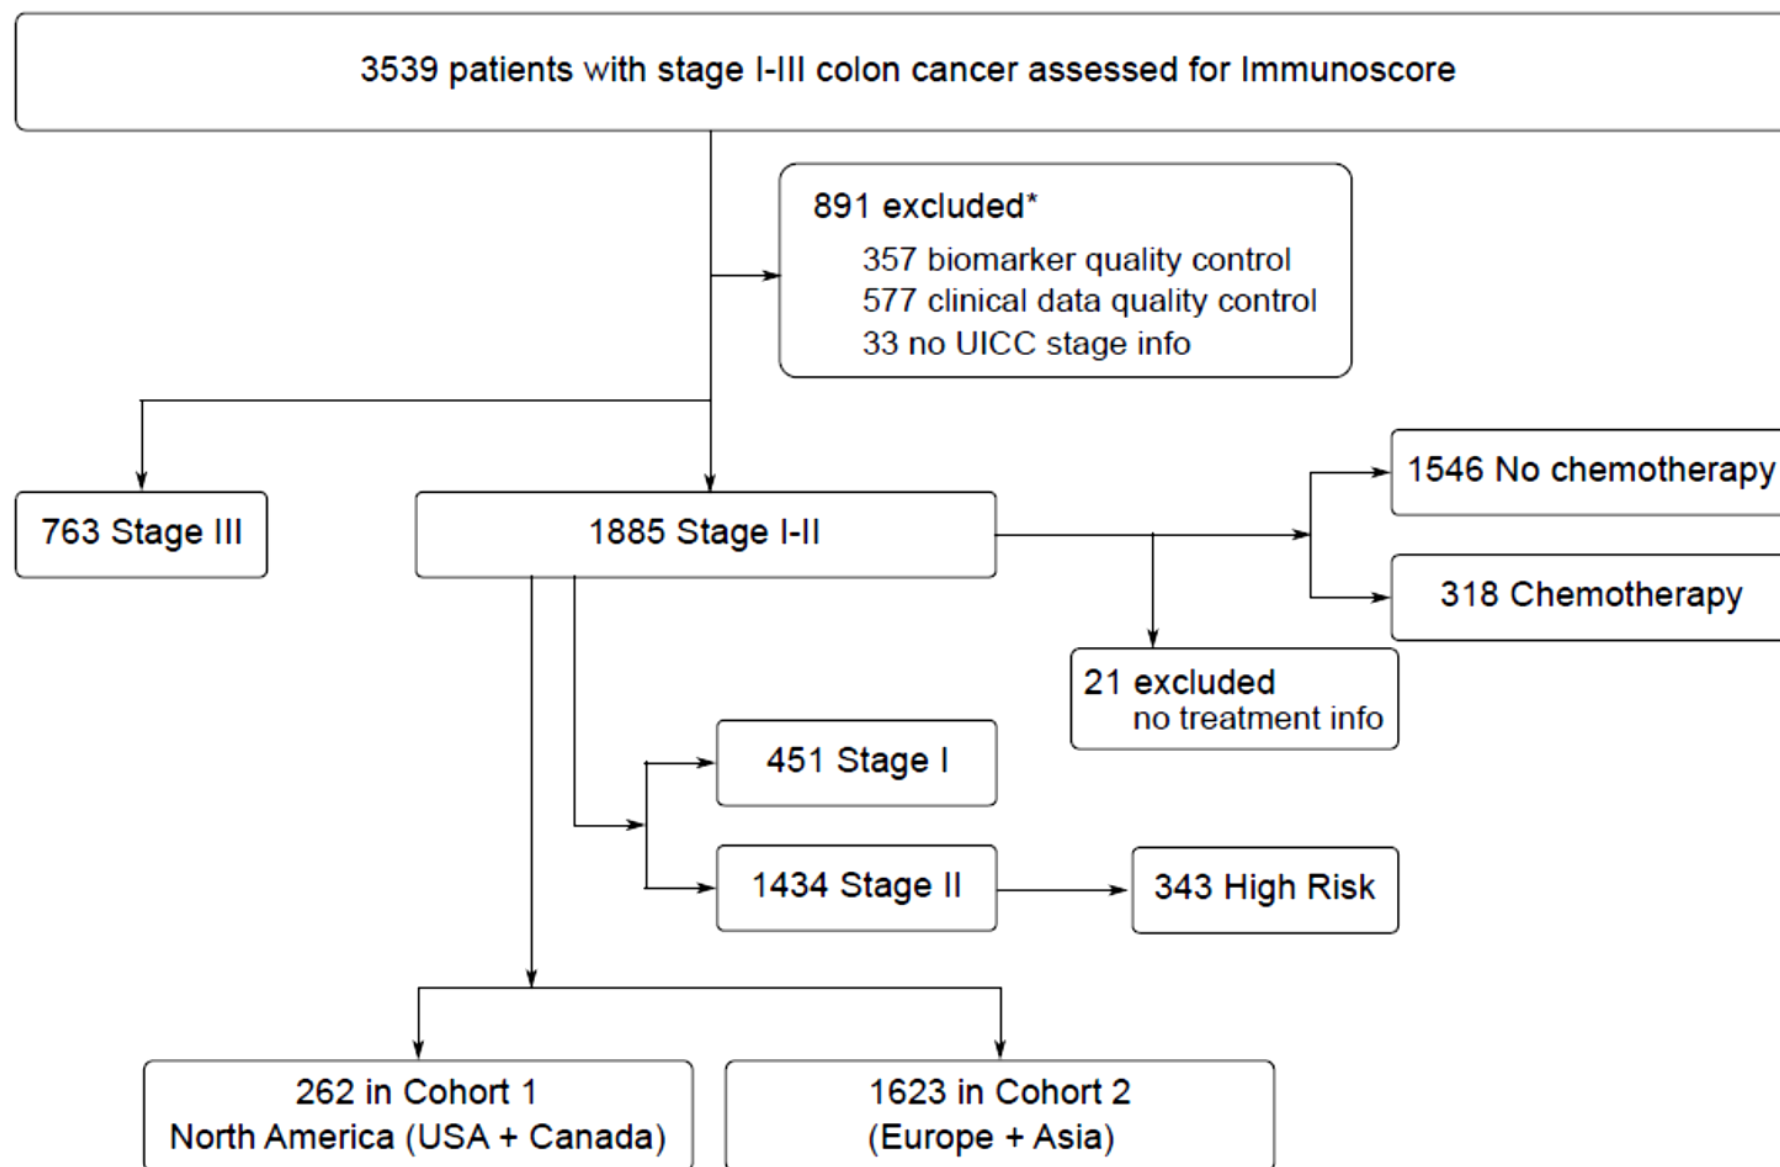

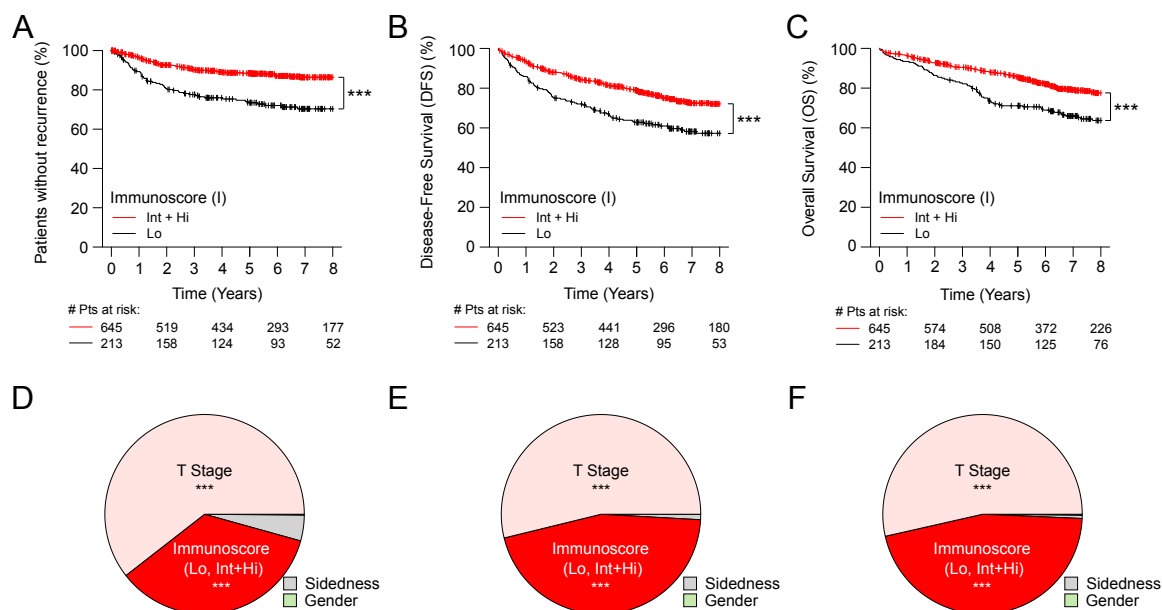

**Figure S1.** The impact of Immunoscore on the survival of patients from cohorts 1+2. Kaplan-Meier curves of Immunoscore (I) are shown for TTR (A), DFS (B) and OS (C) for MSS Stage I/II patients from cohort 1+2 (A-C). Immunoscore two categories, I Lo (0 -25%, black), I Int+Hi (>25 -100%, red), is illustrated. Relative importance of each risk parameter to survival risk for TTR(D), DFS (E) and OS (F) using the  $\chi^2$  proportion test for clinical parameters and Immunoscore corresponding to panel A-C. Significant logrank *P*-values are marked as \*\*\* *p*< 0.001.

Figure S1

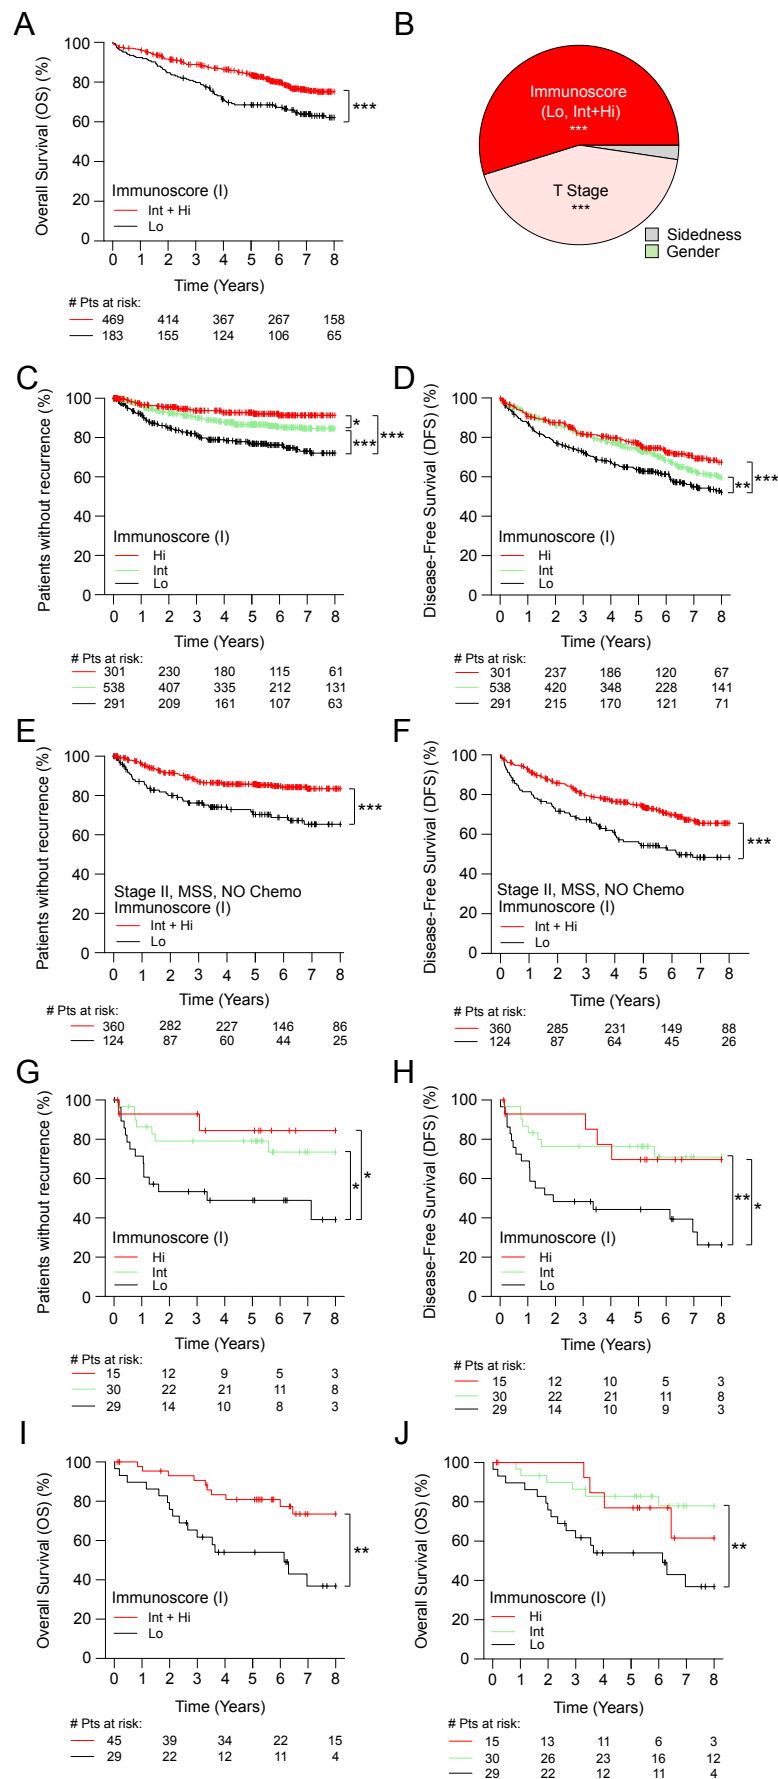

Figure S2

**Figure S2.** The impact of Immunoscore on patients with Stage II colon cancer.

Kaplan-Meier curves of Immunoscore (I) are shown for OS (**A, I, J**), TTR (**C, E, G**) and DFS (**D, F, H**) for subgroups of Stage II patients from cohorts 1 and 2. (**A**) Kaplan-Meier curves for OS are shown for Immunoscore two categories: Lo (0-25%, black) and Int+Hi (>25-100%, red) in MSS Stage II patients. (**B**) Relative importance of each risk parameter to survival risk for OS using the  $\chi^2$  proportion test for clinical parameters and Immunoscore corresponding to panel A. (**C, D**) Immunoscore three categories, I Lo (0-25%, black), I Int (>25-70%, green) and I Hi (>70-100%, red), in Stage II patients who did not receive adjuvant chemotherapy for TTR (**C**) and DFS (**D**). (**E, F**) Immunoscore two categories: Lo (0-25%, black) and Int+Hi (>25-100%, red) in MSS Stage II patients without chemotherapy treatment. (**G, H**) Immunoscore three categories in high-risk Stage II patients for TTR (**G**) and DFS (**H**). (**I, J**) Kaplan-Meier curves for OS are shown for Immunoscore two categories (**I**) and three categories (**J**) in high-risk Stage II patients. Significant logrank *P*-values are marked as \*\*\*  $p < 0.001$ , \*\*  $0.001 < p \leq 0.01$ , \*  $0.01 < p \leq 0.05$ .

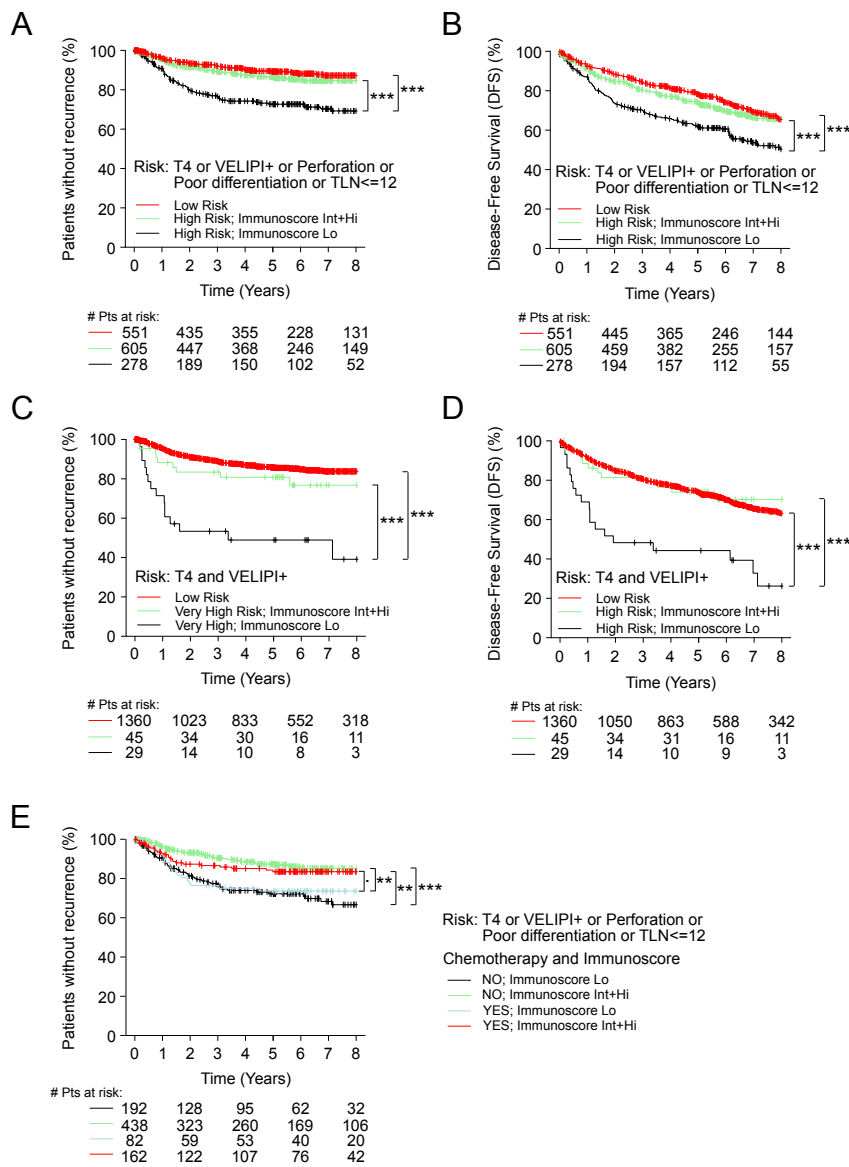

**Figure S3.** The impact of Immunoscoring on patients with high-risk Stage II colon cancer. Kaplan-Meier curves of Immunoscoring (I) three categories, I Lo (0-25%, black), I Int (>25-70%, green) and I Hi (>70-100%, red) are shown for TTR (**A, C**) and DFS (**B, D**) for subgroups of Stage II patients from cohorts 1 and 2. (**A, B**) high-risk Stage II patients: T4 or VELIPI+ or perforation or poor differentiation or TLN≤12. (**C, D**) very high-risk Stage II patients: T4 and VELIPI+. (**E**) High risk Stage II patients, Immunoscoring two categories Lo (0-25%), I Int+Hi (>25-100%) and chemotherapy (YES/NO) are shown for TTR. Significant logrank *P*-values are marked as \*\*\* *p* < 0.001, \*\* 0.001 < *p* ≤ 0.01.

**Figure S3**

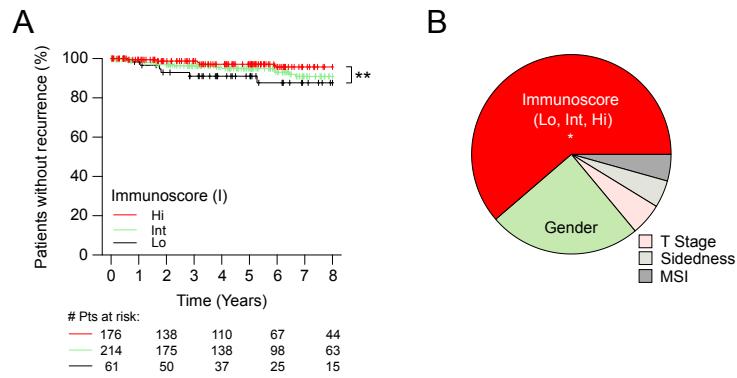

**Figure S4.** The impact of Immunoscoring on patients with Stage I colon cancer. **(A)** Kaplan-Meier curves for TTR of Immunoscoring (I) three categories, I Lo (0 -25%, black), I Int (>25 -70%, green) and I Hi (>70 -100%, red), in Stage I patients from cohorts 1 and 2. **(B)** Relative importance of each risk parameter to survival risk for TTR using the  $\chi^2$  proportion test for clinical parameters and Immunoscoring in three categories corresponding to panel A. Significant logrank *P*-values are marked as \*\* 0.001 < *p* ≤ 0.01, \* 0.01 < *p* ≤ 0.05.

Figure S4

Table S1. Demographic distribution.

|                                             | North-America<br>Cohort 1<br>(N=262) | Europe & Asia<br>Cohort 2<br>(N=1623) | Total<br>Cohorts 1+2<br>(N=1885) | Fisher's exact test P-value<br>Cohorts 1 vs. 2 | STAGE I<br>Cohorts 1+2<br>(N=451) | STAGE II<br>Cohorts 1+2<br>(N=1434) | STAGE II very high risk<br>Cohorts 1+2<br>(N=74) |
|---------------------------------------------|--------------------------------------|---------------------------------------|----------------------------------|------------------------------------------------|-----------------------------------|-------------------------------------|--------------------------------------------------|
| <b>Age</b>                                  |                                      |                                       |                                  | 0.1517 *                                       |                                   |                                     |                                                  |
| <b>N</b>                                    | 262                                  | 1623                                  | 1885                             |                                                | 451                               | 1434                                | 74                                               |
| <b>Mean (SD)</b>                            | 66.9 (12.5)                          | 68.1 (12.2)                           | 67.9 (12.2)                      |                                                | 67.3 (12.5)                       | 68.2 (12.1)                         | 66.4 (11.4)                                      |
| <b>Range</b>                                | (23-92)                              | (21-101)                              | (21-101)                         |                                                | (22-95)                           | (21-101)                            | (40-92)                                          |
| <b>Gender</b>                               |                                      |                                       |                                  | 0.7389                                         |                                   |                                     |                                                  |
| <b>Male</b>                                 | 135 (51.5%)                          | 857 (52.8%)                           | 992 (52.6%)                      |                                                | 238 (52.8%)                       | 754 (52.6%)                         | 34 (45.9%)                                       |
| <b>Female</b>                               | 127 (48.5%)                          | 766 (47.2%)                           | 893 (47.4%)                      |                                                | 213 (47.2%)                       | 680 (47.4%)                         | 40 (55.4%)                                       |
| <b>T-stage</b>                              |                                      |                                       |                                  | <0.0001                                        |                                   |                                     |                                                  |
| <b>T1</b>                                   | 36 (13.7%)                           | 80 (4.9%)                             | 116 (6.2%)                       |                                                | 116 (25.7%)                       | 0 (0.0%)                            | 0 (0.0%)                                         |
| <b>T2</b>                                   | 66 (25.2%)                           | 269 (16.6%)                           | 335 (17.8%)                      |                                                | 335 (74.3%)                       | 0 (0.0%)                            | 0 (0.0%)                                         |
| <b>T3</b>                                   | 143 (54.6%)                          | 1083 (66.7%)                          | 1226 (65%)                       |                                                | 0 (0.0%)                          | 1226 (85.5%)                        | 0 (0.0%)                                         |
| <b>T4</b>                                   | 17 (6.5%)                            | 191 (11.8%)                           | 208 (11%)                        |                                                | 0 (0.0%)                          | 208 (14.5%)                         | 74 (100%)                                        |
| <b>N-stage</b>                              |                                      |                                       |                                  |                                                |                                   |                                     |                                                  |
| <b>N0</b>                                   | 262 (100.0%)                         | 1623 (100.0%)                         | 1885 (100.0%)                    |                                                | 451 (100%)                        | 1434 (100.0%)                       | 74 (100%)                                        |
| <b>N+</b>                                   | 0 (0.0%)                             | 0 (0.0%)                              | 0 (0.0%)                         |                                                | 0 (0.0%)                          | 0 (0.0%)                            | 0 (0.0%)                                         |
| <b>Total lymphnodes examined</b>            |                                      |                                       |                                  | 0.8710 *                                       |                                   |                                     |                                                  |
| <b>N</b>                                    | 262                                  | 1623                                  | 1885                             |                                                | 451                               | 1434                                | 74                                               |
| <b>Mean (SD)</b>                            | 19.1 (12.9)                          | 18.9 (13.9)                           | 19.0 (13.8)                      |                                                | 15.2 (10.4)                       | 20.1 (14.5)                         | 21.3 (14.7)                                      |
| <b>Range</b>                                | (1-108)                              | (1-145)                               | (1-145)                          |                                                | (1-62)                            | (1-145)                             | (1-62)                                           |
| <b>Not Available</b>                        | 8 (3.1%)                             | 0 (0.0%)                              | 0 (0.04%)                        |                                                | 4 (0.9%)                          | 4 (0.3%)                            | 0 (0.0%)                                         |
| <b>M-stage</b>                              |                                      |                                       |                                  |                                                |                                   |                                     |                                                  |
| <b>M0</b>                                   | 262 (100.0%)                         | 1623 (100.0%)                         | 1885 (100.0%)                    |                                                | 451 (100%)                        | 1434 (100.0%)                       | 74 (100%)                                        |
| <b>AJCC/UICC-TNM Composite Stage</b>        |                                      |                                       |                                  | <0.0001                                        |                                   |                                     |                                                  |
| <b>I</b>                                    | 102 (38.9%)                          | 349 (21.5%)                           | 451 (23.9%)                      |                                                | 451 (100%)                        | 0 (0.0%)                            | 0 (0.0%)                                         |
| <b>II</b>                                   | 160 (61.1%)                          | 1274 (78.5%)                          | 1434 (76.1%)                     |                                                | 0 (0.0%)                          | 1434 (100.0%)                       | 74 (100%)                                        |
| <b>Differentiation Grade</b>                |                                      |                                       |                                  | <0.0001                                        |                                   |                                     |                                                  |
| <b>Well</b>                                 | 32 (12.2%)                           | 434 (26.7%)                           | 466 (24.7%)                      |                                                | 143 (31.7%)                       | 323 (22.5%)                         | 14 (18.9%)                                       |
| <b>Moderate</b>                             | 202 (77.1%)                          | 700 (43.1%)                           | 902 (47.9%)                      |                                                | 222 (49.2%)                       | 680 (47.4%)                         | 42 (56.8%)                                       |
| <b>Poor</b>                                 | 25 (9.5%)                            | 141 (8.7%)                            | 166 (8.8%)                       |                                                | 19 (4.2%)                         | 147 (10.3%)                         | 8 (10.8%)                                        |
| <b>Not Available</b>                        | 3 (1.1%)                             | 348 (21.4%)                           | 351 (18.6%)                      |                                                | 67 (14.9%)                        | 284 (19.8%)                         | 10 (13.5%)                                       |
| <b>Post-Operative Chemotherapy (Yes/No)</b> |                                      |                                       |                                  | 0.07509                                        |                                   |                                     |                                                  |
| <b>No</b>                                   | 226 (86.3%)                          | 1320 (81.3%)                          | 1546 (82%)                       |                                                | 416 (92.2%)                       | 1130 (78.8%)                        | 36 (48.6%)                                       |
| <b>Yes</b>                                  | 34 (13%)                             | 284 (17.5%)                           | 318 (16.9%)                      |                                                | 27 (6%)                           | 291 (20.3%)                         | 38 (51.4%)                                       |
| <b>Not Available</b>                        | 2 (0.8%)                             | 19 (1.2%)                             | 21 (1.1%)                        |                                                | 8 (1.8%)                          | 13 (0.9%)                           | 0 (0.0%)                                         |
| <b>Proximal vs. Distal Primary (Tumor)</b>  |                                      |                                       |                                  | 0.0618                                         |                                   |                                     |                                                  |
| <b>Proximal</b>                             | 147 (56.1%)                          | 798 (49.2%)                           | 945 (50.1%)                      |                                                | 208 (46.1%)                       | 737 (51.4%)                         | 37 (50%)                                         |
| <b>Distal</b>                               | 115 (43.9%)                          | 810 (49.9%)                           | 925 (49.1%)                      |                                                | 240 (53.2%)                       | 685 (47.8%)                         | 36 (48.6%)                                       |
| <b>Not Available</b>                        | 0 (0%)                               | 15 (0.9%)                             | 15 (0.8%)                        |                                                | 3 (0.7%)                          | 12 (0.8%)                           | 1 (1.4%)                                         |
| <b>MSI Status (Derived)</b>                 |                                      |                                       |                                  | 0.5934                                         |                                   |                                     |                                                  |
| <b>pMMR</b>                                 | 119 (45.4%)                          | 739 (45.5%)                           | 858 (45.5%)                      |                                                | 206 (45.7%)                       | 652 (45.5%)                         | 33 (44.6%)                                       |
| <b>dMMR</b>                                 | 35 (13.4%)                           | 193 (11.9%)                           | 228 (12.1%)                      |                                                | 39 (8.6%)                         | 189 (13.2%)                         | 12 (16.2%)                                       |
| <b>Not Available</b>                        | 108 (41.2%)                          | 691 (42.6%)                           | 799 (42.4%)                      |                                                | 206 (0.7%)                        | 593 (41.4%)                         | 29 (39.2%)                                       |

\* T test P-value. MSI: deficient Mismatch repair (dMMR), MSS: proficient Mismatch repair (pMMR).

**Table S2. Univariate analysis STAGE I-II**  
**STAGE I-II, North-America (Cohort 1)**

| Time to recurrence (TTR)           |                     |                           |          | Unadjusted stratified by center |           |                  | Restricted Mean Survival Time (RMST) |                          |            |
|------------------------------------|---------------------|---------------------------|----------|---------------------------------|-----------|------------------|--------------------------------------|--------------------------|------------|
|                                    | No. of patients (%) | Rate at 5 yr (%) (95% CI) | P value* | Hazard ratio (95% CI)           | P value** | C-index (95% CI) | Months (95% CI)                      | Relative Months (95% CI) | P value*** |
| <b>IS-2Level</b>                   |                     |                           |          |                                 |           |                  |                                      |                          |            |
| 0-25%                              | 21 (8)              | 60 (41.6-86.5)            |          | 1.0 (reference)                 |           |                  | 101.6 (72.3-130.9)                   | 0.0 (reference)          |            |
| 25-100%                            | 241 (92)            | 91.4 (87.5-95.4)          | <.0001   | 0.19 (0.08-0.43)                | <.0001    |                  | 142.6 (137.2-148.1)                  | 41.1 (11.2-70.9)         | 0.0070     |
| <b>IS-3Level</b>                   |                     |                           |          |                                 |           |                  |                                      |                          |            |
| 0-25%                              | 21 (8)              | 60 (41.6-86.5)            |          | 1.0 (reference)                 |           | 0.69 (0.56-0.82) | 101.6 (72.3-130.9)                   | 0.0 (reference)          |            |
| 25-70%                             | 143 (54.6)          | 88.3 (82.7-94.3)          | 0.0014   | 0.27 (0.11-0.62)                | 0.0023    |                  | 138 (130.1-146)                      | 36.4 (6-66.8)            | 0.0189     |
| 70-100%                            | 98 (37.4)           | 96.3 (92.3-100)           | <.0001   | 0.07 (0.02-0.27)                | 0.0001    |                  | 144.8 (139.4-150.2)                  | 46.6 (18-75.3)           | 0.0014     |
| <b>Disease free survival (DFS)</b> |                     |                           |          |                                 |           |                  |                                      |                          |            |
|                                    | No. of patients (%) | Rate at 5 yr (%) (95% CI) | P value* | Hazard ratio (95% CI)           | P value** | C-index (95% CI) | Months (95% CI)                      | Relative Months (95% CI) | P value*** |
| <b>IS-2Level</b>                   |                     |                           |          |                                 |           |                  |                                      |                          |            |
| 0-25%                              | 21 (8)              | 60.6 (42.5-86.5)          |          | 1.0 (reference)                 |           | 0.54 (0.5-0.58)  | 96.5 (67.4-125.6)                    | 0.0 (reference)          |            |
| 25-100%                            | 241 (92)            | 83.1 (78.2-88.2)          | 0.0646   | 0.48 (0.24-0.97)                | 0.0399    |                  | 117.9 (110.2-125.6)                  | 21.4 (-8.7-51.5)         | 0.1636     |
| <b>IS-3Level</b>                   |                     |                           |          |                                 |           |                  |                                      |                          |            |
| 0-25%                              | 21 (8)              | 60.6 (42.5-86.5)          |          | 1.0 (reference)                 |           | 0.54 (0.45-0.62) | 96.5 (67.4-125.6)                    | 0.0 (reference)          |            |
| 25-70%                             | 143 (54.6)          | 83.2 (77-89.9)            | 0.0425   | 0.45 (0.22-0.95)                | 0.0359    |                  | 121.5 (111.7-131.2)                  | 25 (-5.7-55.7)           | 0.1102     |
| 70-100%                            | 98 (37.4)           | 82.9 (75.3-91.2)          | 0.1735   | 0.51 (0.24-1.09)                | 0.0835    |                  | 110.8 (99.1-122.5)                   | 17.4 (-12.8-47.7)        | 0.2580     |

**STAGE I-II, Europe & Asia (Cohort 2)**

| Time to recurrence (TTR)           |                     |                           |          | Unadjusted stratified by center |           |                  | Restricted Mean Survival Time (RMST) |                          |            |
|------------------------------------|---------------------|---------------------------|----------|---------------------------------|-----------|------------------|--------------------------------------|--------------------------|------------|
|                                    | No. of patients (%) | Rate at 5 yr (%) (95% CI) | P value* | Hazard ratio (95% CI)           | P value** | C-index (95% CI) | Months (95% CI)                      | Relative Months (95% CI) | P value*** |
| <b>IS-2Level</b>                   |                     |                           |          |                                 |           |                  |                                      |                          |            |
| 0-25%                              | 427 (26.3)          | 79.4 (75.4-83.7)          |          | 1.0 (reference)                 |           | 0.59 (0.52-0.66) | 210.1 (198.9-221.2)                  | 0.0 (reference)          |            |
| 25-100%                            | 1196 (73.7)         | 89.8 (87.9-91.7)          | <.0001   | 0.47 (0.35-0.63)                | <.0001    |                  | 240.2 (235.1-245.3)                  | 30.2 (17.9-42.4)         | <.0001     |
| <b>IS-3Level</b>                   |                     |                           |          |                                 |           |                  |                                      |                          |            |
| 0-25%                              | 427 (26.3)          | 79.4 (75.4-83.7)          |          | 1.0 (reference)                 |           | 0.62 (0.53-0.71) | 210.1 (198.9-221.2)                  | 0.0 (reference)          |            |
| 25-70%                             | 747 (46)            | 88 (85.5-90.6)            | <.0001   | 0.55 (0.41-0.76)                | 0.0002    |                  | 235.4 (228.5-242.3)                  | 25.3 (12.2-38.4)         | 0.0001     |
| 70-100%                            | 449 (27.7)          | 92.8 (90.1-95.5)          | <.0001   | 0.31 (0.2-0.49)                 | <.0001    |                  | 248.6 (241.3-255.8)                  | 38.5 (25.2-51.8)         | <.0001     |
| <b>Disease free survival (DFS)</b> |                     |                           |          |                                 |           |                  |                                      |                          |            |
|                                    | No. of patients (%) | Rate at 5 yr (%) (95% CI) | P value* | Hazard ratio (95% CI)           | P value** | C-index (95% CI) | Months (95% CI)                      | Relative Months (95% CI) | P value*** |
| <b>IS-2Level</b>                   |                     |                           |          |                                 |           |                  |                                      |                          |            |
| 0-25%                              | 427 (26.3)          | 67.6 (63.1-72.4)          |          | 1.0 (reference)                 |           | 0.54 (0.5-0.59)  | 124.2 (110.8-137.7)                  | 0.0 (reference)          |            |
| 25-100%                            | 1196 (73.7)         | 77 (74.5-79.6)            | <.0001   | 0.68 (0.57-0.81)                | <.0001    |                  | 153.4 (144.8-162.1)                  | 29.2 (13.2-45.2)         | 0.0003     |
| <b>IS-3Level</b>                   |                     |                           |          |                                 |           |                  |                                      |                          |            |
| 0-25%                              | 427 (26.3)          | 67.6 (63.1-72.4)          |          | 1.0 (reference)                 |           | 0.56 (0.5-0.61)  | 124.2 (110.8-137.7)                  | 0.0 (reference)          |            |
| 25-70%                             | 747 (46)            | 75.6 (72.4-78.9)          | 0.0044   | 0.75 (0.62-0.9)                 | 0.0026    |                  | 147.9 (137.4-158.4)                  | 23.7 (6.6-40.7)          | 0.0066     |
| 70-100%                            | 449 (27.7)          | 79.3 (75.3-83.5)          | <.0001   | 0.55 (0.44-0.7)                 | <.0001    |                  | 164.5 (149.3-179.8)                  | 40.3 (20-60.6)           | 0.0001     |

**STAGE I-II (Cohorts 1+2)**

| Time to recurrence (TTR)           |                     |                           |          | Unadjusted stratified by center |           |                  | Restricted Mean Survival Time (RMST) |                          |            |
|------------------------------------|---------------------|---------------------------|----------|---------------------------------|-----------|------------------|--------------------------------------|--------------------------|------------|
|                                    | No. of patients (%) | Rate at 5 yr (%) (95% CI) | P value* | Hazard ratio (95% CI)           | P value** | C-index (95% CI) | Months (95% CI)                      | Relative Months (95% CI) | P value*** |
| <b>IS-2Level</b>                   |                     |                           |          |                                 |           |                  |                                      |                          |            |
| 0-25%                              | 448 (23.8)          | 78.4 (74.4-82.6)          |          | 1.0 (reference)                 |           | 0.59 (0.52-0.66) | 208.1 (197.1-219)                    | 0.0 (reference)          |            |
| 25-100%                            | 1437 (76.2)         | 90 (88.3-91.8)            | <.0001   | 0.43 (0.32-0.57)                | <.0001    |                  | 240.9 (236.3-245.6)                  | 32.9 (21-44.8)           | <.0001     |
| <b>IS-3Level</b>                   |                     |                           |          |                                 |           |                  |                                      |                          |            |
| 0-25%                              | 448 (23.8)          | 78.4 (74.4-82.6)          |          | 1.0 (reference)                 |           | 0.63 (0.53-0.72) | 208.1 (197.1-219)                    | 0.0 (reference)          |            |
| 25-70%                             | 890 (47.2)          | 88.1 (85.7-90.4)          | <.0001   | 0.52 (0.39-0.7)                 | <.0001    |                  | 235.4 (229.1-241.7)                  | 27.3 (14.7-40)           | <.0001     |
| 70-100%                            | 547 (29)            | 93.4 (91.1-95.8)          | <.0001   | 0.27 (0.18-0.41)                | <.0001    |                  | 250.5 (244.2-256.7)                  | 42.4 (29.8-55)           | <.0001     |
| <b>Disease free survival (DFS)</b> |                     |                           |          |                                 |           |                  |                                      |                          |            |
|                                    | No. of patients (%) | Rate at 5 yr (%) (95% CI) | P value* | Hazard ratio (95% CI)           | P value** | C-index (95% CI) | Months (95% CI)                      | Relative Months (95% CI) | P value*** |
| <b>IS-2Level</b>                   |                     |                           |          |                                 |           |                  |                                      |                          |            |
| 0-25%                              | 448 (23.8)          | 67.3 (62.9-72)            |          | 1.0 (reference)                 |           | 0.54 (0.5-0.59)  | 124.3 (111-137.6)                    | 0.0 (reference)          |            |
| 25-100%                            | 1437 (76.2)         | 78 (75.7-80.3)            | <.0001   | 0.67 (0.56-0.79)                | <.0001    |                  | 154.9 (146.6-163.1)                  | 30.6 (14.9-46.3)         | 0.0001     |
| <b>IS-3Level</b>                   |                     |                           |          |                                 |           |                  |                                      |                          |            |
| 0-25%                              | 448 (23.8)          | 67.3 (62.9-72)            |          | 1.0 (reference)                 |           | 0.56 (0.5-0.61)  | 124.3 (111-137.6)                    | 0.0 (reference)          |            |
| 25-70%                             | 890 (47.2)          | 76.8 (73.9-79.8)          | 0.0004   | 0.72 (0.6-0.86)                 | 0.0005    |                  | 151.5 (141.3-161.7)                  | 27.2 (10.4-44)           | 0.0015     |
| 70-100%                            | 547 (29)            | 80 (76.4-83.7)            | <.0001   | 0.57 (0.45-0.71)                | <.0001    |                  | 161.4 (147.2-175.6)                  | 37.1 (17.7-56.6)         | 0.0002     |

**STAGE I-II, MSS (Cohorts 1+2)**

| Time to recurrence (TTR)           |                     |                           |          | Unadjusted stratified by center |           |                  | Restricted Mean Survival Time (RMST) |                          |            |
|------------------------------------|---------------------|---------------------------|----------|---------------------------------|-----------|------------------|--------------------------------------|--------------------------|------------|
|                                    | No. of patients (%) | Rate at 5 yr (%) (95% CI) | P value* | Hazard ratio (95% CI)           | P value** | C-index (95% CI) | Months (95% CI)                      | Relative Months (95% CI) | P value*** |
| <b>IS-2Level</b>                   |                     |                           |          |                                 |           |                  |                                      |                          |            |
| 0-25%                              | 213 (24.8)          | 73.5 (67.5-80)            |          | 1.0 (reference)                 |           | 0.59 (0.52-0.66) | 163.8 (150.7-176.8)                  | 0.0 (reference)          |            |
| 25-100%                            | 645 (75.2)          | 88.5 (85.9-91.1)          | <.0001   | 0.43 (0.32-0.57)                | <.0001    |                  | 196.2 (190.5-201.8)                  | 32.4 (18.1-46.7)         | <.0001     |
| <b>IS-3Level</b>                   |                     |                           |          |                                 |           |                  |                                      |                          |            |
| 0-25%                              | 213 (24.8)          | 73.5 (67.5-80)            |          | 1.0 (reference)                 |           | 0.63 (0.53-0.72) | 163.8 (150.7-176.8)                  | 0.0 (reference)          |            |
| 25-70%                             | 443 (51.6)          | 87.3 (84-90.6)            | <.0001   | 0.52 (0.39-0.7)                 | <.0001    |                  | 192.9 (185.8-200.1)                  | 29.2 (14.2-44.1)         | 0.0001     |
| 70-100%                            | 202 (23.5)          | 91.1 (86.9-95.5)          | <.0001   | 0.27 (0.18-0.41)                | <.0001    |                  | 203.8 (195-212.5)                    | 40 (24.3-55.8)           | <.0001     |
| <b>Disease free survival (DFS)</b> |                     |                           |          |                                 |           |                  |                                      |                          |            |
|                                    | No. of patients (%) | Rate at 5 yr (%) (95% CI) | P value* | Hazard ratio (95% CI)           | P value** | C-index (95% CI) | Months (95% CI)                      | Relative Months (95% CI) | P value*** |
| <b>IS-2Level</b>                   |                     |                           |          |                                 |           |                  |                                      |                          |            |
| 0-25%                              | 213 (24.8)          | 62.8 (56.5-69.8)          |          | 1.0 (reference)                 |           | 0.54 (0.5-0.59)  | 116.3 (100.4-132.3)                  | 0.0 (reference)          |            |
| 25-100%                            | 645 (75.2)          | 78.7 (75.4-82)            | <.0001   | 0.67 (0.56-0.79)                | <.0001    |                  | 155.1 (146.5-163.6)                  | 38.7 (20.6-56.8)         | <.0001     |
| <b>IS-3Level</b>                   |                     |                           |          |                                 |           |                  |                                      |                          |            |
| 0-25%                              | 213 (24.8)          | 62.8 (56.5-69.8)          |          | 1.0 (reference)                 |           | 0.56 (0.5-0.61)  | 116.3 (100.4-132.3)                  | 0.0 (reference)          |            |
| 25-70%                             | 443 (51.6)          | 77.5 (73.5-81.6)          | <.0001   | 0.72 (0.6-0.86)                 | 0.0005    |                  | 153 (142.6-163.4)                    | 36.7 (17.6-55.7)         | 0.0002     |
| 70-100%                            | 202 (23.5)          | 81.3 (75.7-87.4)          | <.0001   | 0.57 (0.45-0.71)                | <.0001    |                  | 160.1 (145-175.2)                    | 43.7 (21.8-65.7)         | <.0001     |
| <b>Overall survival (OS)</b>       |                     |                           |          |                                 |           |                  |                                      |                          |            |
|                                    | No. of patients (%) | Rate at 5 yr (%) (95% CI) | P value* | Hazard ratio (95% CI)           | P value** | C-index (95% CI) | Months (95% CI)                      | Relative Months (95% CI) | P value*** |
| <b>IS-2Level</b>                   |                     |                           |          |                                 |           |                  |                                      |                          |            |
| 0-25%                              | 213 (24.8)          | 71.1 (65.2-77.5)          |          | 1.0 (reference)                 |           |                  | 171.9 (151.3-192.5)                  | 0.0 (reference)          |            |
| 25-100%                            | 645 (75.2)          | 85.4 (82.6-88.2)          | <.0001   |                                 |           |                  | 206 (193-219)                        | 34.1 (9.7-58.5)          | 0.0061     |
| <b>IS-3Level</b>                   |                     |                           |          |                                 |           |                  |                                      |                          |            |
| 0-25%                              | 213 (24.8)          | 71.1 (65.2-77.5)          |          | 1.0 (reference)                 |           |                  | 171.9 (151.3-192.5)                  | 0.0 (reference)          |            |
| 25-70%                             | 443 (51.6)          | 84.5 (81.1-88)            | 0.0003   |                                 |           |                  | 206.3 (190.2-222.5)                  | 34.4 (8.2-60.6)          | 0.0101     |
| 70-100%                            | 202 (23.5)          | 87.4 (82.7-92.4)          | 0.0010   |                                 |           |                  | 206.7 (184.4-229)                    | 34.8 (4.4-65.2)          | 0.0247     |

\* Logrank P Value. \*\* Wald P Value stratified by participating center. \*\*\* Restricted Mean Survival Time (RMST) P value



Table S3. Univariate analysis STAGE II

STAGE II, Without Chemotherapy (Cohorts 1+2)

| Time to recurrence (TTR)    |                     |                         |          | Unadjusted stratified by center |           |                  | Restricted Mean Survival Time (RMST) |                          |            |
|-----------------------------|---------------------|-------------------------|----------|---------------------------------|-----------|------------------|--------------------------------------|--------------------------|------------|
|                             | No. of patients (%) | Rate at 5 yr % (95% CI) | P value* | Hazard ratio (95% CI)           | P value** | C-index (95% CI) | Months (95% CI)                      | Relative Months (95% CI) | P value*** |
| IS-2Level                   |                     |                         |          |                                 |           | 0.59 (0.51-0.68) |                                      |                          |            |
|                             | 291 (25.8)          | 76.8 (71.7-82.3)        |          | 1.0 (reference)                 |           |                  | 202.3 (187.9-216.6)                  | 0.0 (reference)          |            |
|                             | 839 (74.2)          | 88.7 (86.4-91.1)        | <.0001   | 0.44 (0.32-0.62)                | <.0001    |                  | 237.7 (231.4-244.1)                  | 35.5 (19.8-51.2)         | <.0001     |
| IS-3Level                   |                     |                         |          |                                 |           | 0.62 (0.52-0.73) |                                      |                          |            |
|                             | 291 (25.8)          | 76.8 (71.7-82.3)        |          | 1.0 (reference)                 |           |                  | 202.3 (187.9-216.6)                  | 0.0 (reference)          |            |
|                             | 538 (47.6)          | 86.6 (83.4-89.9)        | 0.0001   | 0.52 (0.36-0.74)                | 0.0003    |                  | 232.3 (223.9-240.7)                  | 30 (13.4-46.7)           | 0.0004     |
| 70-100%                     | 301 (26.6)          | 92.7 (89.4-96)          | <.0001   | 0.3 (0.18-0.5)                  | <.0001    |                  | 248 (239.1-256.9)                    | 45.8 (28.9-62.7)         | <.0001     |
| Disease free survival (DFS) |                     |                         |          | Unadjusted stratified by center |           |                  | Restricted Mean Survival Time (RMST) |                          |            |
|                             | No. of patients (%) | Rate at 5 yr % (95% CI) | P value* | Hazard ratio (95% CI)           | P value** | C-index (95% CI) | Months (95% CI)                      | Relative Months (95% CI) | P value*** |
| IS-2Level                   |                     |                         |          |                                 |           | 0.54 (0.49-0.59) |                                      |                          |            |
|                             | 291 (25.8)          | 63.6 (58.2-69.6)        |          | 1.0 (reference)                 |           |                  | 112.9 (98.4-127.4)                   | 0.0 (reference)          |            |
|                             | 839 (74.2)          | 74.8 (71.8-78)          | 0.0004   | 0.7 (0.57-0.86)                 | 0.0007    |                  | 141.2 (131.2-151.3)                  | 28.3 (10.7-46)           | 0.0016     |
| IS-3Level                   |                     |                         |          |                                 |           | 0.55 (0.48-0.61) |                                      |                          |            |
|                             | 291 (25.8)          | 63.6 (58.2-69.6)        |          | 1.0 (reference)                 |           |                  | 112.9 (98.4-127.4)                   | 0.0 (reference)          |            |
|                             | 538 (47.6)          | 74 (70.1-78)            | 0.0031   | 0.74 (0.59-0.92)                | 0.0060    |                  | 139 (127-151)                        | 26.1 (7.3-44.9)          | 0.0064     |
| 70-100%                     | 301 (26.6)          | 76.5 (71.5-81.8)        | 0.0008   | 0.64 (0.49-0.83)                | 0.0008    |                  | 145.8 (127.5-164.2)                  | 33 (9.6-56.3)            | 0.0057     |

STAGE II, MSS, Without Chemotherapy (Cohorts 1+2)

| Time to recurrence (TTR)    |                     |                         |          | Unadjusted stratified by center |           |                  | Restricted Mean Survival Time (RMST) |                          |            |
|-----------------------------|---------------------|-------------------------|----------|---------------------------------|-----------|------------------|--------------------------------------|--------------------------|------------|
|                             | No. of patients (%) | Rate at 5 yr % (95% CI) | P value* | Hazard ratio (95% CI)           | P value** | C-index (95% CI) | Months (95% CI)                      | Relative Months (95% CI) | P value*** |
| IS-2Level                   |                     |                         |          |                                 |           | 0.57 (0.51-0.63) |                                      |                          |            |
|                             | 124 (25.6)          | 70.3 (62-79.7)          |          | 1.0 (reference)                 |           |                  | 155 (136.3-173.6)                    | 0.0 (reference)          |            |
|                             | 360 (74.4)          | 85.7 (82-89.7)          | 0.0001   | 0.43 (0.27-0.67)                | 0.0002    |                  | 190.4 (182-198.7)                    | 35.4 (15-55.8)           | 0.0007     |
| IS-3Level                   |                     |                         |          |                                 |           | 0.59 (0.53-0.65) |                                      |                          |            |
|                             | 124 (25.6)          | 70.3 (62-79.7)          |          | 1.0 (reference)                 |           |                  | 155 (136.3-173.6)                    | 0.0 (reference)          |            |
|                             | 253 (52.3)          | 84.4 (79.8-89.3)        | 0.0010   | 0.47 (0.29-0.76)                | 0.0021    |                  | 187.4 (177.1-197.6)                  | 32.4 (11.2-53.7)         | 0.0028     |
| 70-100%                     | 107 (22.1)          | 88.9 (82.6-95.7)        | 0.0007   | 0.33 (0.17-0.65)                | 0.0015    |                  | 197.8 (184.1-211.6)                  | 42.9 (19.7-66)           | 0.0003     |
| Disease free survival (DFS) |                     |                         |          | Unadjusted stratified by center |           |                  | Restricted Mean Survival Time (RMST) |                          |            |
|                             | No. of patients (%) | Rate at 5 yr % (95% CI) | P value* | Hazard ratio (95% CI)           | P value** | C-index (95% CI) | Months (95% CI)                      | Relative Months (95% CI) | P value*** |
| IS-2Level                   |                     |                         |          |                                 |           | 0.56 (0.52-0.6)  |                                      |                          |            |
|                             | 124 (25.6)          | 63.2 (55.1-72.4)        |          | 1.0 (reference)                 |           |                  | 146.9 (121.9-171.9)                  | 0.0 (reference)          |            |
|                             | 360 (74.4)          | 80.6 (76.5-84.9)        | 0.0006   | 0.59 (0.43-0.81)                | 0.0012    |                  | 188.8 (172.5-205.1)                  | 41.9 (12.1-71.8)         | 0.0059     |
| IS-3Level                   |                     |                         |          |                                 |           | 0.57 (0.52-0.62) |                                      |                          |            |
|                             | 124 (25.6)          | 63.2 (55.1-72.4)        |          | 1.0 (reference)                 |           |                  | 141.4 (118-164.7)                    | 0.0 (reference)          |            |
|                             | 253 (52.3)          | 79.3 (74.3-84.6)        | 0.0018   | 0.61 (0.43-0.86)                | 0.0046    |                  | 183.1 (164.9-201.2)                  | 41.7 (12.1-71.3)         | 0.0058     |
| 70-100%                     | 107 (22.1)          | 83.8 (76.8-91.5)        | 0.0053   | 0.55 (0.35-0.85)                | 0.0075    |                  | 188.1 (160.7-215.4)                  | 46.7 (10.8-82.6)         | 0.0109     |

STAGE II Very High Risk, T4 and VELIPI+ (Cohorts 1+2)

| Time to recurrence (TTR)    |                     |                         |          | Unadjusted stratified by center |           |                  | Restricted Mean Survival Time (RMST) |                          |            |
|-----------------------------|---------------------|-------------------------|----------|---------------------------------|-----------|------------------|--------------------------------------|--------------------------|------------|
|                             | No. of patients (%) | Rate at 5 yr % (95% CI) | P value* | Hazard ratio (95% CI)           | P value** | C-index (95% CI) | Months (95% CI)                      | Relative Months (95% CI) | P value*** |
| IS-2Level                   |                     |                         |          |                                 |           | 0.6 (0.36-0.84)  |                                      |                          |            |
|                             | 29 (39.2)           | 48.9 (33.2-72)          |          | 1.0 (reference)                 |           |                  | 81 (50.4-111.7)                      | 0.0 (reference)          |            |
|                             | 45 (60.8)           | 80.8 (69.6-93.7)        | 0.0037   | 0.45 (0.17-1.15)                | 0.0964    |                  | 136.4 (116.4-156.3)                  | 55.3 (18.8-91.9)         | 0.0030     |
| IS-3Level                   |                     |                         |          |                                 |           | 0.62 (0.35-0.89) |                                      |                          |            |
|                             | 29 (39.2)           | 48.9 (33.2-72)          |          | 1.0 (reference)                 |           |                  | 81 (50.4-111.7)                      | 0.0 (reference)          |            |
|                             | 30 (40.5)           | 79.1 (65.5-95.5)        | 0.0177   | 0.53 (0.2-1.42)                 | 0.2075    |                  | 131.5 (106.3-156.8)                  | 50.5 (10.8-90.2)         | 0.0127     |
| 70-100%                     | 15 (20.3)           | 84.4 (66.6-100)         | 0.0311   | 0.23 (0.04-1.37)                | 0.1061    |                  | 90.8 (74.1-107.4)                    | 36 (12.2-59.9)           | 0.0031     |
| Disease free survival (DFS) |                     |                         |          | Unadjusted stratified by center |           |                  | Restricted Mean Survival Time (RMST) |                          |            |
|                             | No. of patients (%) | Rate at 5 yr % (95% CI) | P value* | Hazard ratio (95% CI)           | P value** | C-index (95% CI) | Months (95% CI)                      | Relative Months (95% CI) | P value*** |
| IS-2Level                   |                     |                         |          |                                 |           | 0.6 (0.38-0.82)  |                                      |                          |            |
|                             | 29 (39.2)           | 44.3 (29.3-66.9)        |          | 1.0 (reference)                 |           |                  | 60.3 (35.6-85)                       | 0.0 (reference)          |            |
|                             | 45 (60.8)           | 74 (61.8-88.5)          | 0.0011   | 0.44 (0.19-1.02)                | 0.0555    |                  | 117.3 (91.7-142.9)                   | 57 (21.5-92.6)           | 0.0017     |
| IS-3Level                   |                     |                         |          |                                 |           | 0.61 (0.36-0.86) |                                      |                          |            |
|                             | 29 (39.2)           | 44.3 (29.3-66.9)        |          | 1.0 (reference)                 |           |                  | 60.3 (35.6-85)                       | 0.0 (reference)          |            |
|                             | 30 (40.5)           | 76.4 (62.5-93.3)        | 0.0043   | 0.46 (0.19-1.13)                | 0.0917    |                  | 117.1 (88-146.2)                     | 56.8 (18.7-95)           | 0.0035     |
| 70-100%                     | 15 (20.3)           | 69.6 (48.7-99.6)        | 0.0370   | 0.36 (0.09-1.47)                | 0.1560    |                  | 82.2 (64-100.4)                      | 34 (9.9-58.1)            | 0.0057     |

STAGE II Very High Risk IS-2Level vs. LowRisk, T4 and VELIPI+ (Cohorts 1+2)

| Time to recurrence (TTR)              |                     |                         |          | Unadjusted stratified by center |           |                  | Restricted Mean Survival Time (RMST) |                          |            |
|---------------------------------------|---------------------|-------------------------|----------|---------------------------------|-----------|------------------|--------------------------------------|--------------------------|------------|
|                                       | No. of patients (%) | Rate at 5 yr % (95% CI) | P value* | Hazard ratio (95% CI)           | P value** | C-index (95% CI) | Months (95% CI)                      | Relative Months (95% CI) | P value*** |
| Very High Risk IS-2Level vs. Low Risk |                     |                         |          |                                 |           |                  |                                      |                          |            |
| LowRisk                               |                     |                         |          |                                 |           |                  |                                      |                          |            |
| VeryHighRisk-0-25%                    |                     |                         |          |                                 |           |                  |                                      |                          |            |
| VeryHighRisk-25-100%                  |                     |                         |          |                                 |           |                  |                                      |                          |            |
| Disease free survival (DFS)           |                     |                         |          | Unadjusted stratified by center |           |                  | Restricted Mean Survival Time (RMST) |                          |            |
|                                       | No. of patients (%) | Rate at 5 yr % (95% CI) | P value* | Hazard ratio (95% CI)           | P value** | C-index (95% CI) | Months (95% CI)                      | Relative Months (95% CI) | P value*** |
| Very High Risk IS-2Level vs. Low Risk |                     |                         |          |                                 |           |                  |                                      |                          |            |
| LowRisk                               |                     |                         |          |                                 |           |                  |                                      |                          |            |
| VeryHighRisk-0-25%                    |                     |                         |          |                                 |           |                  |                                      |                          |            |
| VeryHighRisk-25-100%                  |                     |                         |          |                                 |           |                  |                                      |                          |            |

STAGE II High Risk IS-2Level vs. LowRisk, T4 OR VELIPI+ OR Perforation OR TLN &lt;=12 OR Poor Differentiation (Cohorts 1+2)

| Time to recurrence (TTR)         |                     |                         |          | Unadjusted stratified by center |           |                  | Restricted Mean Survival Time (RMST) |                          |            |
|----------------------------------|---------------------|-------------------------|----------|---------------------------------|-----------|------------------|--------------------------------------|--------------------------|------------|
|                                  | No. of patients (%) | Rate at 5 yr % (95% CI) | P value* | Hazard ratio (95% CI)           | P value** | C-index (95% CI) | Months (95% CI)                      | Relative Months (95% CI) | P value*** |
| High Risk IS-2Level vs. Low Risk |                     |                         |          |                                 |           | 0.61 (0.56-0.65) |                                      |                          |            |
|                                  | 551 (38.4)          | 89.2 (86.5-92.1)        |          | 1.0 (reference)                 |           |                  | 161.9 (149.8-174)                    | 0.0 (reference)          |            |
|                                  | 278 (19.4)          | 72.7 (67.2-78.6)        | <.0001   | 3.09 (2.06-4.64)                | <.0001    |                  | 161.9 (149.8-174)                    | -36.2 (-49.8--22.6)      | <.0001     |
| HighRisk-25-100%                 | 605 (42.2)          | 86.2 (83.2-89.3)        | 0.1734   | 1.52 (1.04-2.21)                | 0.0295    |                  | 231.8 (223.9-239.7)                  | -6.9 (-17.9-4.1)         | 0.2184     |
| Disease free survival (DFS)      |                     |                         |          | Unadjusted stratified by center |           |                  | Restricted Mean Survival Time (RMST) |                          |            |
|                                  | No. of patients (%) | Rate at 5 yr % (95% CI) | P value* | Hazard ratio (95% CI)           | P value** | C-index (95% CI) | Months (95% CI)                      | Relative Months (95% CI) | P value*** |
| High Risk IS-2Level vs. Low Risk |                     |                         |          |                                 |           | 0.58 (0.55-0.6)  |                                      |                          |            |
|                                  | 551 (38.4)          | 78.3 (74.7-82)          |          | 1.0 (reference)                 |           |                  | 108.2 (95.9-120.5)                   | 0.0 (reference)          |            |
|                                  | 278 (19.4)          | 62 (56.3-68.2)          | <.0001   | 2.14 (1.67-2.74)                | 0.0000    |                  | 108.2 (95.9-120.5)                   | -23.6 (-39.5--7.7)       | 0.0037     |
| HighRisk-25-100%                 | 605 (42.2)          | 73.8 (70.2-77.6)        | 0.6969   | 1.31 (1.06-1.62)                | 0.0136    |                  | 149.6 (137.5-161.8)                  | 5.6 (-14.4-25.6)         | 0.5810     |

STAGE II, T4 and N0 (Cohorts 1+2)

| Time to recurrence (TTR)    |                     |                         |          | Unadjusted stratified by center |           |                  | Restricted Mean Survival Time (RMST) |                          |            |
|-----------------------------|---------------------|-------------------------|----------|---------------------------------|-----------|------------------|--------------------------------------|--------------------------|------------|
|                             | No. of patients (%) | Rate at 5 yr % (95% CI) | P value* | Hazard ratio (95% CI)           | P value** | C-index (95% CI) | Months (95% CI)                      | Relative Months (95% CI) | P value*** |
| IS-2Level                   |                     |                         |          |                                 |           | 0.68 (0.6-0.75)  |                                      |                          |            |
|                             | 72 (34.6)           | 46.3 (35.1-61)          |          | 1.0 (reference)                 |           |                  | 96 (69.9-122.1)                      | 0.0 (reference)          |            |
|                             | 136 (65.4)          | 84.6 (78.3-91.5)        | <.0001   | 0.21 (0.11-0.4)                 | <.0001    |                  | 176.8 (162.5-191.2)                  | 80.9 (51.1-110.6)        | <.0001     |
| Disease free survival (DFS) |                     |                         |          | Unadjusted stratified by center |           |                  | Restricted Mean Survival Time (RMST) |                          |            |
|                             | No. of patients (%) | Rate at 5 yr % (95% CI) | P value* | Hazard ratio (95% CI)           | P value** | C-index (95% CI) | Months (95% CI)                      | Relative Months (95% CI) | P value*** |
| IS-2Level                   |                     |                         |          |                                 |           | 0.64 (0.58-0.69) |                                      |                          |            |
|                             | 72 (34.6)           | 38.5 (28.2-52.5)        |          | 1.0 (reference)                 |           |                  | 69.9 (48.2-91.5)                     | 0.0 (reference)          |            |
|                             | 136 (65.4)          | 70.5 (62.7-79.1)        | <.0001   | 0.31 (0.19-0.49)                | <.0001    |                  | 130.2 (112.9-147.6)                  | 60.4 (32.6-88.1)         | <.0001     |

STAGE II, T4 and N0 and No Chemo Treatment (Cohorts 1+2)

| Time to recurrence (TTR)    |                     |                         |          | Unadjusted stratified by center |           |                  | Restricted Mean Survival Time (RMST) |                          |            |
|-----------------------------|---------------------|-------------------------|----------|---------------------------------|-----------|------------------|--------------------------------------|--------------------------|------------|
|                             | No. of patients (%) | Rate at 5 yr % (95% CI) | P value* | Hazard ratio (95% CI)           | P value** | C-index (95% CI) | Months (95% CI)                      | Relative Months (95% CI) | P value*** |
| IS-2Level                   |                     |                         |          |                                 |           | 0.78 (0.71-0.84) |                                      |                          |            |
|                             | 45 (34.1)           | 40.8 (26.9-61.7)        |          | 1.0 (reference)                 |           |                  | 78.9 (46-111.8)                      | 0.0 (reference)          |            |
|                             | 87 (65.9)           | 87.5 (80.1-95.5)        | <.0001   | 0.12 (0.05-0.28)                | <.0001    |                  | 178.2 (159.8-196.6)                  | 99.3 (61.6-136.9)        | <.0001     |
| Disease free survival (DFS) |                     |                         |          | Unadjusted stratified by center |           |                  | Restricted Mean Survival Time (RMST) |                          |            |
|                             | No. of patients (%) | Rate at 5 yr % (95% CI) | P value* | Hazard ratio (95% CI)           | P value** | C-index (95% CI) | Months (95% CI)                      | Relative Months (95% CI) | P value*** |
| IS-2Level                   |                     |                         |          |                                 |           | 0.67 (0.61-0.74) |                                      |                          |            |
|                             | 45 (34.1)           | 29.1 (17.7-47.8)        |          | 1.0 (reference)                 |           |                  | 54.1 (30.6-77.7)                     | 0.0 (reference)          |            |
|                             | 87 (65.9)           | 68.4 (58.8-79.5)        | <.0001   | 0.25 (0.15-0.44)                | <.0001    |                  | 115 (94.1-135.8)                     | 60.8 (29.4-82.3)         | 0.0002     |

\* Logrank P Value. \*\* Wald P Value stratified by participating center. \*\*\* Restricted Mean Survival Time (RMST) P value. MSS: proficient Mismatch repair (pMMR).

Table S4. Multivariable analysis (Cohorts 1+2)

| STAGE I-II                                  | TTR Model (142/1075)*    |                      |                     | DFS Model (341/1075)*    |                      |                     |
|---------------------------------------------|--------------------------|----------------------|---------------------|--------------------------|----------------------|---------------------|
|                                             | Hazard Ratio<br>(95% CI) | P-value <sup>1</sup> | C-Index<br>(95% CI) | Hazard Ratio<br>(95% CI) | P-value <sup>1</sup> | C-Index<br>(95% CI) |
| <b>Multivariable Stratified Cox Model</b>   |                          |                      | 0.7 (0.65-0.74)     |                          |                      | 0.61 (0.57-0.64)    |
| <b>Immunoscore, 3-level (CD3/CD8 CT/IM)</b> |                          |                      |                     |                          |                      |                     |
| Int vs Lo                                   | 0.47 (0.32-0.68)         | 0.0001               |                     | 0.6 (0.47-0.78)          | 0.0001               |                     |
| Hi vs Lo                                    | 0.29 (0.17-0.5)          | <.0001               |                     | 0.48 (0.35-0.65)         | <.0001               |                     |
| <b>Gender</b>                               |                          |                      |                     |                          |                      |                     |
| Female vs Male                              | 1.02 (0.73-1.43)         | 0.8930               |                     | 1.02 (0.82-1.27)         | 0.8525               |                     |
| <b>T-stage</b>                              |                          |                      |                     |                          |                      |                     |
| T3 vs T1-2                                  | 1.99 (1.18-3.36)         | 0.0098               |                     | 1.62 (1.19-2.22)         | 0.0023               |                     |
| T4 vs T1-2                                  | 5.26 (2.92-9.49)         | <.0001               |                     | 2.42 (1.64-3.57)         | <.0001               |                     |
| <b>MSI Status (Derived)</b>                 |                          |                      |                     |                          |                      |                     |
| dMMR vs pMMR                                | 0.45 (0.25-0.82)         | 0.0087               |                     | 0.96 (0.73-1.28)         | 0.7994               |                     |
| <b>Sidedness</b>                            |                          |                      |                     |                          |                      |                     |
| Distal vs proximal                          | 1.34 (0.95-1.89)         | 0.0930               |                     | 1.05 (0.84-1.32)         | 0.6407               |                     |

\* (Events/Total); <sup>1</sup>Stratified covariate Wald p-value; Stratified by center; MSI: deficient Mismatch repair (dMMR), MSS: proficient Mismatch repair (pMMR).

| STAGE II MSS                                | TTR Model (114/644)*     |                      |                     | DFS Model (230/644)*     |                      |                     |
|---------------------------------------------|--------------------------|----------------------|---------------------|--------------------------|----------------------|---------------------|
|                                             | Hazard Ratio<br>(95% CI) | P-value <sup>1</sup> | C-Index<br>(95% CI) | Hazard Ratio<br>(95% CI) | P-value <sup>1</sup> | C-Index<br>(95% CI) |
| <b>Multivariable Stratified Cox Model</b>   |                          |                      | 0.6 (0.54-0.67)     |                          |                      | 0.57 (0.52-0.61)    |
| <b>Immunoscore, 3-level (CD3/CD8 CT/IM)</b> |                          |                      |                     |                          |                      |                     |
| Hi vs Lo                                    | 0.45 (0.31-0.67)         | 0.0001               |                     | 0.55 (0.41-0.73)         | <.0001               |                     |
| <b>Gender</b>                               |                          |                      |                     |                          |                      |                     |
| Female vs Male                              | 0.89 (0.61-1.3)          | 0.5483               |                     | 1.03 (0.79-1.33)         | 0.8476               |                     |
| <b>T-stage</b>                              |                          |                      |                     |                          |                      |                     |
| T4 vs T3                                    | 2.6 (1.7-3.95)           | <.0001               |                     | 1.74 (1.26-2.42)         | 0.0009               |                     |
| <b>Sidedness</b>                            |                          |                      |                     |                          |                      |                     |
| Distal vs proximal                          | 1.29 (0.88-1.88)         | 0.1867               |                     | 1.04 (0.8-1.36)          | 0.7478               |                     |

\* (Events/Total); <sup>1</sup>Stratified covariate Wald p-value; Stratified by center.

| STAGE I MSS                                 | TTR Model (15/205)*      |                      |                     | DFS Model (44/205)*      |                      |                     |
|---------------------------------------------|--------------------------|----------------------|---------------------|--------------------------|----------------------|---------------------|
|                                             | Hazard Ratio<br>(95% CI) | P-value <sup>1</sup> | C-Index<br>(95% CI) | Hazard Ratio<br>(95% CI) | P-value <sup>1</sup> | C-Index<br>(95% CI) |
| <b>Multivariable Stratified Cox Model</b>   |                          |                      | 0.77 (0.65-0.9)     |                          |                      | 0.64 (0.55-0.74)    |
| <b>Immunoscore, 3-level (CD3/CD8 CT/IM)</b> |                          |                      |                     |                          |                      |                     |
| Int vs Lo                                   | 0.41 (0.13-1.29)         | 0.1261               |                     | 0.75 (0.34-1.68)         | 0.4848               |                     |
| Hi vs Lo                                    | 0.08 (0.01-0.72)         | 0.0245               |                     | 0.4 (0.14-1.11)          | 0.0776               |                     |
| <b>Gender</b>                               |                          |                      |                     |                          |                      |                     |
| Female vs Male                              | 1.58 (0.51-4.94)         | 0.4320               |                     | 0.75 (0.4-1.42)          | 0.3747               |                     |
| <b>T-stage</b>                              |                          |                      |                     |                          |                      |                     |
| T2 vs T1                                    | 2.37 (0.51-10.99)        | 0.2698               |                     | 1.77 (0.77-4.06)         | 0.1798               |                     |
| <b>Sidedness</b>                            |                          |                      |                     |                          |                      |                     |
| Distal vs proximal                          | 1.56 (0.53-4.63)         | 0.4198               |                     | 1.2 (0.64-2.26)          | 0.5673               |                     |

\* (Events/Total); <sup>1</sup>Stratified covariate Wald p-value; Stratified by center. MSS: proficient Mismatch repair (pMMR).

| STAGE II, T4N0                              | TTR Model (24/94)*       |                      |                     | DFS Model (41/94)*       |                      |                     |
|---------------------------------------------|--------------------------|----------------------|---------------------|--------------------------|----------------------|---------------------|
|                                             | Hazard Ratio<br>(95% CI) | P-value <sup>1</sup> | C-Index<br>(95% CI) | Hazard Ratio<br>(95% CI) | P-value <sup>1</sup> | C-Index<br>(95% CI) |
| <b>Multivariable Stratified Cox Model</b>   |                          |                      | 0.76 (0.64-0.88)    |                          |                      | 0.74 (0.65-0.83)    |
| <b>Immunoscore, 3-level (CD3/CD8 CT/IM)</b> |                          |                      |                     |                          |                      |                     |
| Hi vs Lo                                    | 0.15 (0.05-0.46)         | 0.0009               |                     | 0.2 (0.08-0.5)           | 0.0006               |                     |
| <b>Gender</b>                               |                          |                      |                     |                          |                      |                     |
| Female vs Male                              | 1.33 (0.53-3.3)          | 0.5441               |                     | 1.5 (0.74-3.02)          | 0.2605               |                     |
| <b>Sidedness</b>                            |                          |                      |                     |                          |                      |                     |
| Distal vs proximal                          | 1.32 (0.49-3.57)         | 0.5821               |                     | 1.31 (0.58-2.96)         | 0.5192               |                     |
| <b>MSI Status (Derived)</b>                 |                          |                      |                     |                          |                      |                     |
| dMMR vs pMMR                                | 0.42 (0.12-1.48)         | 0.1775               |                     | 0.33 (0.13-0.88)         | 0.0266               |                     |
| <b>Differentiation</b>                      |                          |                      |                     |                          |                      |                     |
| Moderate vs well                            | 0.49 (0.1-2.35)          | 0.3759               |                     | 0.93 (0.31-2.73)         | 0.8915               |                     |
| Poor vs well                                | 0.53 (0.06-4.53)         | 0.5631               |                     | 2.09 (0.47-9.22)         | 0.3293               |                     |
| <b>Mucinous colloid type</b>                |                          |                      |                     |                          |                      |                     |
| Yes vs No                                   | 1 (0.35-2.85)            | 0.9995               |                     | 0.96 (0.44-2.12)         | 0.9278               |                     |
| <b>VELIP+</b>                               |                          |                      |                     |                          |                      |                     |
| Yes vs No                                   | 0.79 (0.25-2.46)         | 0.6870               |                     | 0.82 (0.35-1.93)         | 0.6452               |                     |

\* (Events/Total); <sup>1</sup>Stratified covariate Wald p-value; Stratified by center. MSS: proficient Mismatch repair (pMMR).

| Sect on & Topic          | No Item | details                                                                                                                                                | Checklist                                                                                                                                                                                                                                                                                                                                                                                                         |
|--------------------------|---------|--------------------------------------------------------------------------------------------------------------------------------------------------------|-------------------------------------------------------------------------------------------------------------------------------------------------------------------------------------------------------------------------------------------------------------------------------------------------------------------------------------------------------------------------------------------------------------------|
| <b>TITLE OR ABSTRACT</b> | 1       | Identif cat on as a study of diagnost c accuracy using at least one measure of accuracy                                                                | Yes                                                                                                                                                                                                                                                                                                                                                                                                               |
| <b>ABSTRACT</b>          | 2       | Structured summary of study design, methods, results, and conclusions (for specif c guidance, see STARD for Abstracts)                                 | Yes                                                                                                                                                                                                                                                                                                                                                                                                               |
| <b>INTRODUCTION</b>      | 3       | Scientif c and clinical background, including the intended use and clinical role of the index test                                                     | Yes (novel Immune classif cat on of colon cancer, def ne high and low risk Stage I/III and Stage II colon cancer)                                                                                                                                                                                                                                                                                                 |
|                          | 4       | Study object ves and hypotheses                                                                                                                        | Yes                                                                                                                                                                                                                                                                                                                                                                                                               |
| <b>METHODS</b>           |         |                                                                                                                                                        |                                                                                                                                                                                                                                                                                                                                                                                                                   |
| <b>Study design</b>      | 5       | Whether data collect on was planned before the index test and reference standard were performed (prospect ve study) or af er (retrospect ve study)     | Yes, Retrospect ve study using pre-def ned test and scoring method and cutof , on 3 independent datasets                                                                                                                                                                                                                                                                                                          |
| <b>Part cipants</b>      | 6       | Eligibility criteria                                                                                                                                   | Yes, (Inclusions: Pat ent with colon cancer; Age > 18 years; Pat ent had surgery performed prior to 2010. (5 years follow-up is recommended) ; Therapeut c procedures (surgery, radiotherapy, chemotherapy, biotherapy, ...) and follow-up registered; T1, T2, T3, T4 tumors; All N stages; pM0 at the t me of diagnosis ; Adjuvant chemotherapy is allowed ). (Exclusion: Neo-adjuvant treatment, rectum cancer) |
|                          | 7       | On what basis potent ally eligible part cipants were identif ed (such as symptoms, results from previous tests, inclusion in registry)                 | Yes, (pat ents with eligibility criteria from part cipat ng centers)                                                                                                                                                                                                                                                                                                                                              |
|                          | 8       | Where and when potent ally eligible part cipants were identif ed (set ng, locat on and dates)                                                          | Yes, (from part cipat ng centers)                                                                                                                                                                                                                                                                                                                                                                                 |
|                          | 9       | Whether part cipants formed a consecut ve, random or convenience series                                                                                | Yes (pat ents with eligibility criteria from part cipat ng centers, randomly selected with 5 years follow-up)                                                                                                                                                                                                                                                                                                     |
| <b>Test methods</b>      | 10a     | Index test, in suf cient detail to allow replicat on                                                                                                   | Yes (mult ple reproducibility data and details fro replicat on)                                                                                                                                                                                                                                                                                                                                                   |
|                          | 10b     | Reference standard, in suf cient detail to allow replicat on                                                                                           | Yes (AJCC/UICC-TNM)                                                                                                                                                                                                                                                                                                                                                                                               |
|                          | 11      | Rat onale for choosing the reference standard (if alternat ves exist)                                                                                  | Yes, (meta-analysis for available evidence of the associat on of immune cell inf ltrates with prognosis in various types of cancers)                                                                                                                                                                                                                                                                              |
|                          | 12a     | Def nit on of and rat onale for test posit vity cut-of s or result categories of the index test, dist nguishing pre-specif ed from exploratory         | Yes, (Test method was pre-def ned, cutof were def ned in the Training set, and subsequently validated in the independent datasets)                                                                                                                                                                                                                                                                                |
|                          | 12b     | Def nit on of and rat onale for test posit vity cut-of s or result categories of the reference standard, dist nguishing pre-specif ed from exploratory | Yes (AJCC/UICC-TNM)                                                                                                                                                                                                                                                                                                                                                                                               |
|                          | 13a     | Whether clinical informat on and reference standard results were available to the performers/readers of the index test                                 | Yes, (clinical informat on, percent les methods and cutof of the test are given)                                                                                                                                                                                                                                                                                                                                  |
|                          | 13b     | Whether clinical informat on and index test results were available to the assessors of the reference standard                                          | Reference (AJCC/UICC-TNM); Test was performed blinded to clinical data and reference standard. Reference standard was done blinded to Test.                                                                                                                                                                                                                                                                       |
| <b>Analysis</b>          | 14      | Methods for est mat ng or comparing measures of diagnost c accuracy                                                                                    | Yes, (several methods, including Cox mult variate analyses with Logrank P-values, Wald P-values, Chi2 risk contribut on, and Harrel's c-index are reported)                                                                                                                                                                                                                                                       |
|                          | 15      | How indeterminate index test or reference standard results were handled                                                                                | Yes, (pat ents with indeterminate data were excluded from the study)                                                                                                                                                                                                                                                                                                                                              |
|                          | 16      | How missing data on the index test and reference standard were handled                                                                                 | Yes, (pat ents with missing data were excluded from the study)                                                                                                                                                                                                                                                                                                                                                    |
|                          | 17      | Any analyses of variability in diagnost c accuracy, dist nguishing pre-specif ed from exploratory                                                      | Yes, (Test was pre-specif ed, test method was pre-def ned, cutof were def ned in the Training set, and subsequently validated in the independent datasets)                                                                                                                                                                                                                                                        |
|                          | 18      | Intended sample size and how it was determined                                                                                                         | Yes (>600 pat ents in each dataset, and >1200 Stage II, based on HR/P-values from previous studies)                                                                                                                                                                                                                                                                                                               |
| <b>RESULTS</b>           |         |                                                                                                                                                        |                                                                                                                                                                                                                                                                                                                                                                                                                   |
| <b>Part cipants</b>      | 19      | Flow of part cipants, using a diagram                                                                                                                  | Yes (see supplementary material)                                                                                                                                                                                                                                                                                                                                                                                  |
|                          | 20      | Baseline demographic and clinical characterist cs of part cipants                                                                                      | Yes (Table S1)                                                                                                                                                                                                                                                                                                                                                                                                    |
|                          | 21a     | Distribut on of severity of disease in those with the target condit on                                                                                 | Yes (see supplementary tables)                                                                                                                                                                                                                                                                                                                                                                                    |
|                          | 21b     | Distribut on of alternat ve diagnoses in those without the target condit on                                                                            | na                                                                                                                                                                                                                                                                                                                                                                                                                |
|                          | 22      | Time interval and any clinical intervent ons between index test and reference standard                                                                 | Yes (Standard of care from real-life cancers in each center)                                                                                                                                                                                                                                                                                                                                                      |
| <b>Test results</b>      | 23      | Cross tabulat on of the index test results (or their distribut on) by the results of the reference standard                                            | na                                                                                                                                                                                                                                                                                                                                                                                                                |
|                          | 24      | Est mates of diagnost c accuracy and their precision (such as 95% conf dence intervals)                                                                | Yes (see tables)                                                                                                                                                                                                                                                                                                                                                                                                  |
|                          | 25      | Any adverse events from performing the index test or the reference standard                                                                            | na                                                                                                                                                                                                                                                                                                                                                                                                                |
| <b>DISCUSSION</b>        | 26      | Study limitat ons, including sources of potent al bias, stat st cal uncertainty, and generalisability                                                  | Yes                                                                                                                                                                                                                                                                                                                                                                                                               |
|                          | 27      | Implicat ons for pract ce, including the intended use and clinical role of the index test                                                              | Yes (novel Immune classif cat on of colon cancer, def ne high and low risk Stage I/III and Stage II colon cancer)                                                                                                                                                                                                                                                                                                 |
| <b>OTHER INFORMATION</b> | 28      | Registrat on number and name of registry                                                                                                               | na                                                                                                                                                                                                                                                                                                                                                                                                                |
|                          | 29      | Where the full study protocol can be accessed                                                                                                          | Yes                                                                                                                                                                                                                                                                                                                                                                                                               |
|                          | 30      | Sources of funding and other support; role of funders                                                                                                  | Yes                                                                                                                                                                                                                                                                                                                                                                                                               |

Table S5: STARD checklist
